# Supplementary material for: Strain effects on stability, electronic and optical properties of two-dimensional C4X2 (X = F, Cl, Br)
Source: Royal Society of Chemistry journal article supplement (doi:10.1039/d1tc00507c), 2021-01-01
Supplement: d1tc00507c1.pdf [file d1tc00507c1.pdf]

## Supporting Information for

### Strain effects on stability, electronic and optical properties of two-dimensional $C_4X_2$ ( $X = F, Cl, Br$ )

Huabing Shu\*

School of Science, Jiangsu University of Science and Technology, Zhenjiang 212001, China

\*E-mail: [shuhuabing@just.edu.cn](mailto:shuhuabing@just.edu.cn)

**Table S1** Lattice constant  $a/b$ , in-plane C-C bond length  $l_{C-C}(\text{in})$ , interlay C-C bond length  $l_{C-C}(\text{out})$ , bucking height  $\Delta$  and C-C-C bond angle of buckled graphene layer in the  $C_4X_2$  ( $X = F, Cl, Br$ ). The  $E_B$  is the binding energies of the  $C_4X_2$ . Length and energy units are in Å and eV/atom, respectively.

| Name      | $a/b$                | $l_{C-C}(\text{in})$ | $l_{C-C}(\text{out})$ | $l_{C-X}$            | $\Delta$             | $\theta$ | $E_B$ |
|-----------|----------------------|----------------------|-----------------------|----------------------|----------------------|----------|-------|
| $C_4F_2$  | 2.560                | 1.561                | 1.547                 | 1.369                | 0.503                | 110.126° | 6.672 |
|           | 2.561 <sup>[1]</sup> | 1.553 <sup>[1]</sup> | 1.553 <sup>[1]</sup>  | 1.378 <sup>[1]</sup> | 0.503 <sup>[1]</sup> | ——       | ——    |
|           | 2.552 <sup>[2]</sup> | 1.538 <sup>[2]</sup> | 1.556 <sup>[2]</sup>  | 1.361 <sup>[2]</sup> | 0.499 <sup>[2]</sup> | ——       | ——    |
| $C_4Cl_2$ | 2.760                | 1.672                | 1.531                 | 1.750                | 0.505                | 111.208° | 5.482 |
| $C_4Br_2$ | 2.870                | 1.731                | 1.521                 | 1.928                | 0.500                | 112.000° | 4.966 |

**Table S2** Average valence electrons of each C and X atoms for the  $C_4X_2$  ( $X = F, Cl, Br$ ), calculated by Bader analysis.

| Name      | $C_1$ ( e ) | $C_2$ ( e ) | $X_1$ ( e ) | $C_3$ ( e ) | $X_2$ ( e ) | $C_4$ ( e ) |
|-----------|-------------|-------------|-------------|-------------|-------------|-------------|
| $C_4F_2$  | 4.033       | 3.256       | 7.799       | 3.256       | 7.799       | 3.856       |
| $C_4Cl_2$ | 4.089       | 3.884       | 7.119       | 3.844       | 7.119       | 3.903       |
| $C_4Br_2$ | 4.039       | 4.093       | 6.964       | 4.093       | 6.964       | 3.846       |

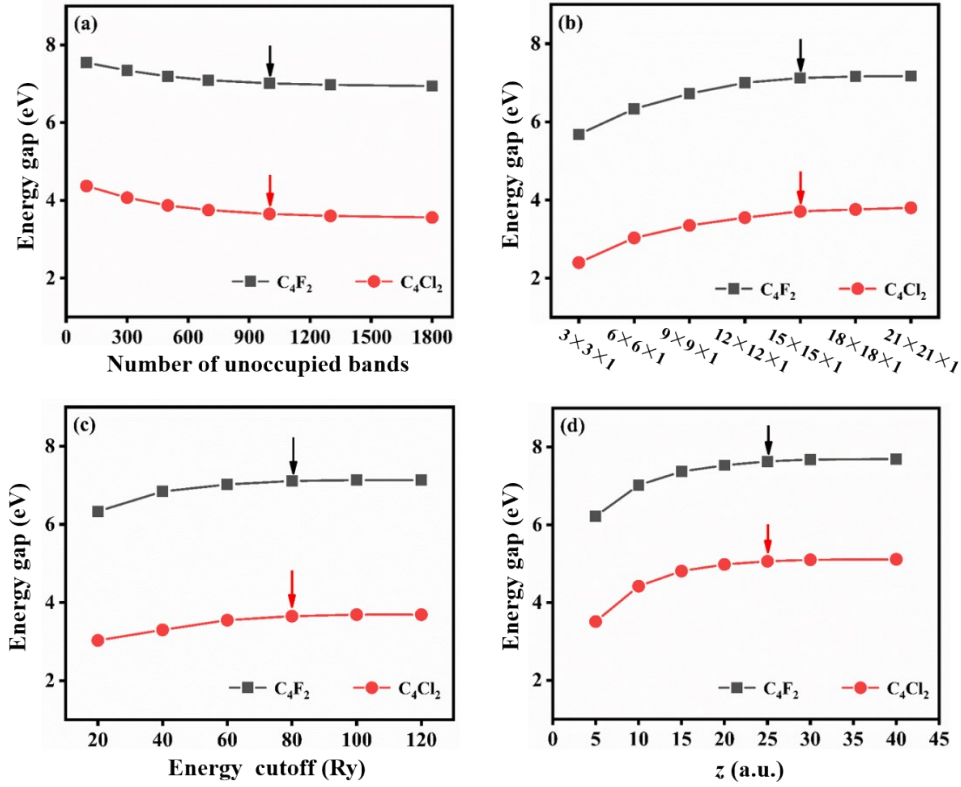

**Fig. S1** Convergence of quasi-particle bandgaps with respect to the size of number of occupied bands (a),  $k$ -point grid sampling of Brillouin zone (b), energy cutoff (c), and a box-shaped truncation (d) for the  $C_4F_2$  and  $C_4Cl_2$ , respectively. The arrows denote the adopted parameters in  $G_0W_0$  and BSE calculations.

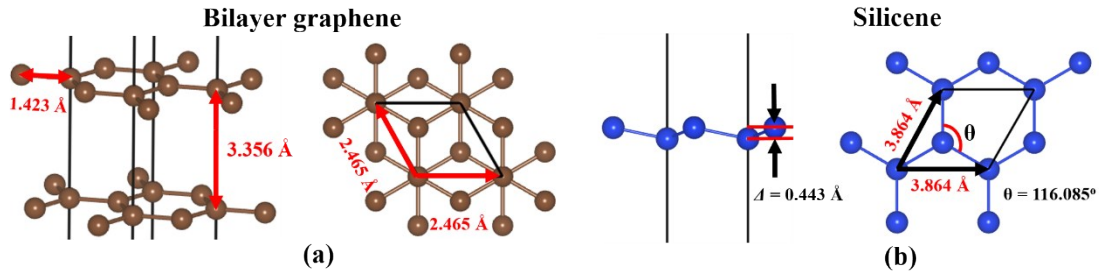

**Fig. S2** Optimized geometries of the bilayer graphene (a) and silicene (b).

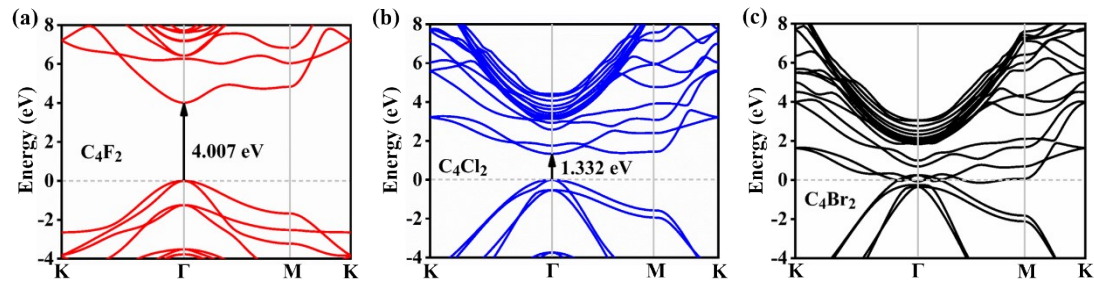

**Fig. S3** Band structures of the  $C_4X_2$  at the PBE level: (a)  $C_4F_2$ , (b)  $C_4Cl_2$ , (c)  $C_4Br_2$ .

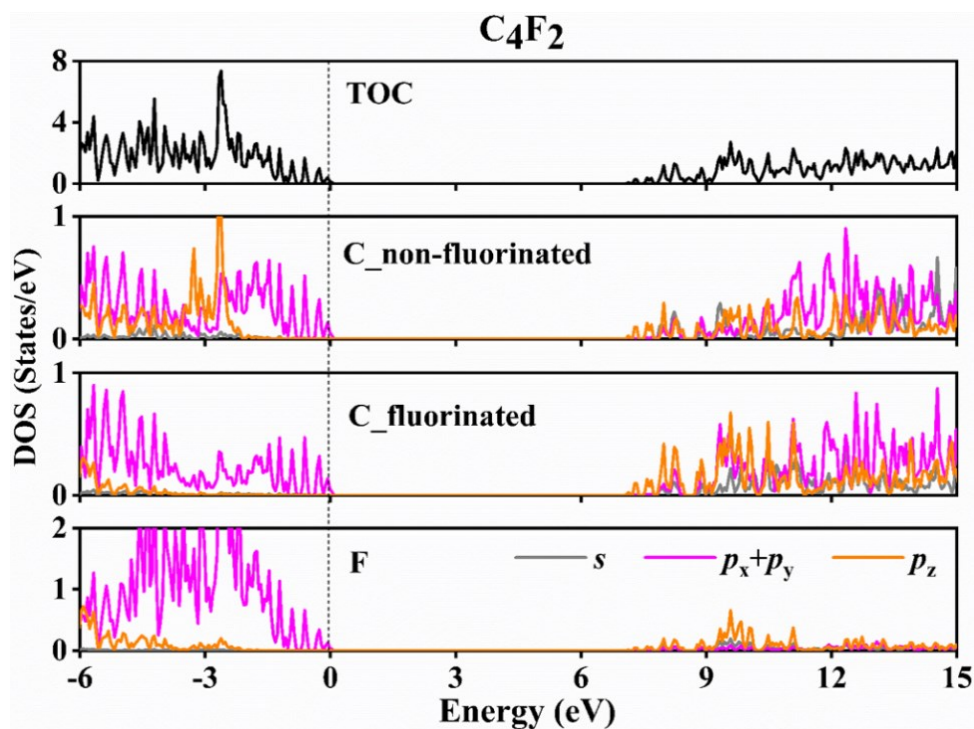

**Fig. S4** Total and partial density of states of the  $C_4F_2$ . “C\_fluorinated” shows the fluorinated C atoms.

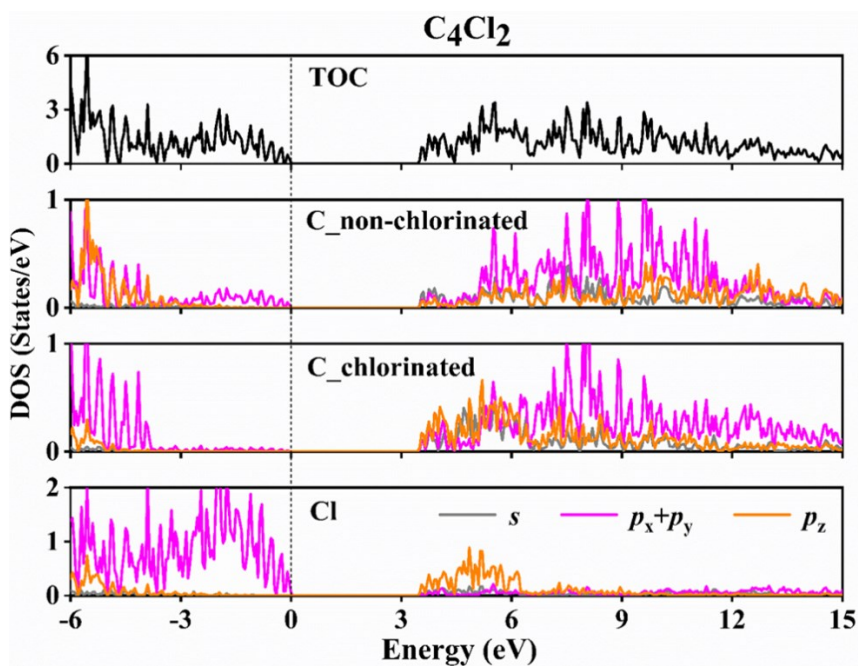

**Fig. S5** Total and partial density of states of the  $C_4Cl_2$ . “C\_chlorinated” shows the chlorinated C atoms.

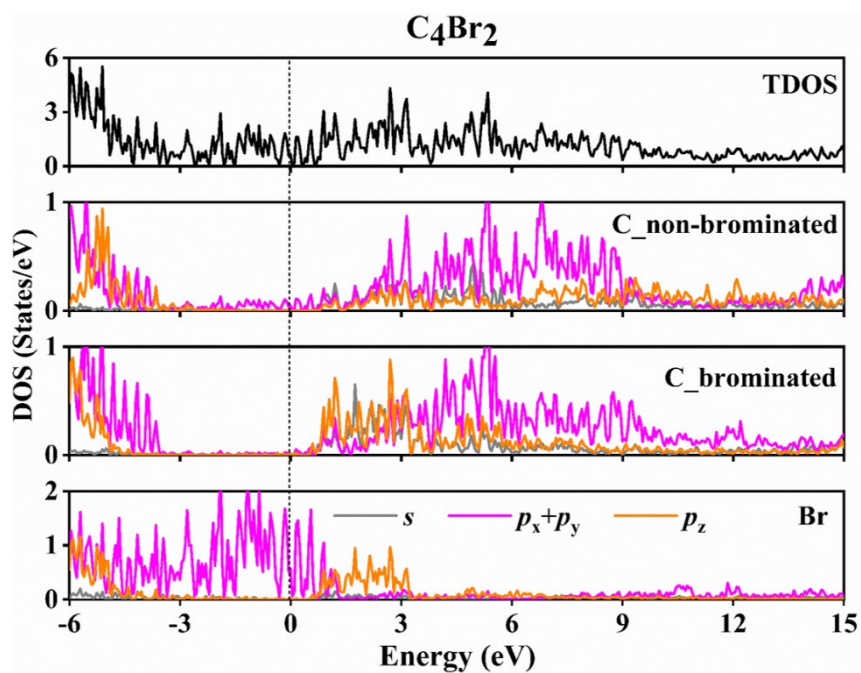

**Fig. S6** Total and partial density of states of the C<sub>4</sub>Br<sub>2</sub>. “C\_brominated” shows the brominated C atoms.

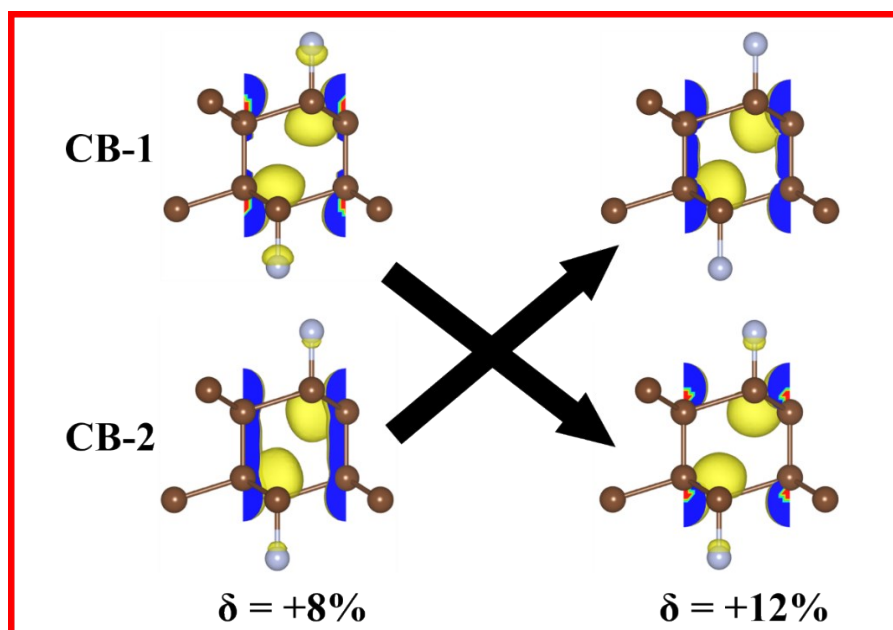

**Fig. S7** Partial charge density of CB-1 and CB-2 at  $\Gamma$ -point for the C<sub>4</sub>F<sub>2</sub> at tensile strains of 8% and 12%. Isovalue of  $9 \times 10^{-3} e/\text{\AA}^3$  is adopted.

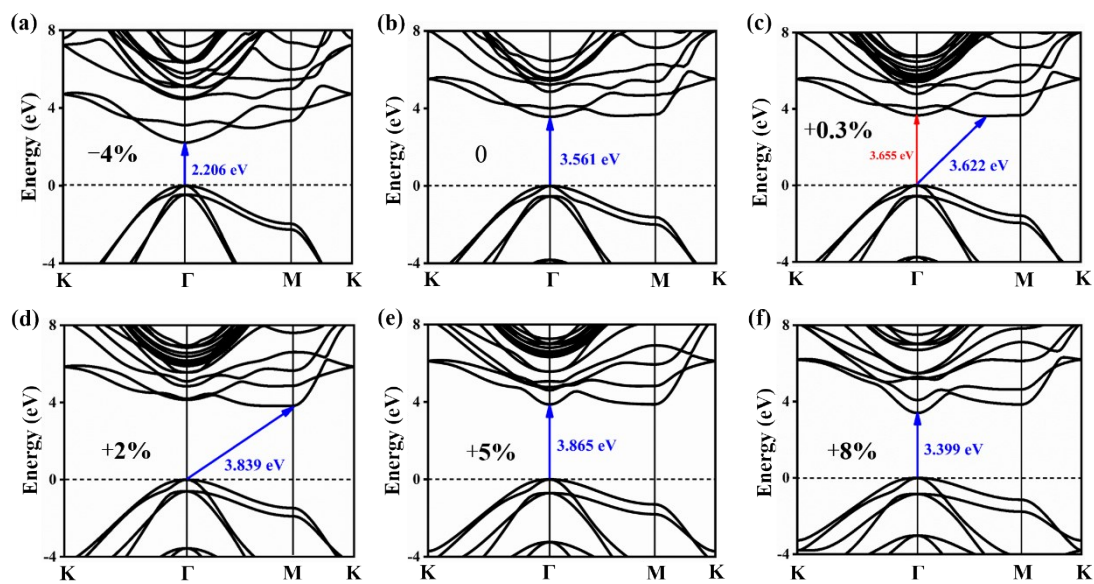

**Fig. S8** (a)–(f) Variable quasi-particle band structures of the  $C_4Cl_2$  under different biaxial strains ( $\delta = -4\%$ ,  $0$ ,  $+0.3\%$ ,  $+2\%$ ,  $+5\%$ ,  $+8\%$ ).

## References

- 1 L. Yuan, Z. Li, J. Yang and J. G. Hou, *Phys. Chem. Chem. Phys.*, 2012, **14**, 8179–8184.
- 2 C.-H. Hu, P. Zhang, H.-Y. Liu, S.-Q. Wu, Y. Yang and Z.-Z. Zhu, *J. Phys. Chem. C*, 2013, **117**, 3572–3579.
